# Metabolic syndrome and the incidence of lung cancer: a meta-analysis of cohort studies

Dong Li<sup>1</sup> and Heinv Yang<sup>1</sup>

<sup>1</sup>Department of Cardiac and Thoracic Surgery, Weihai Central Hospital, Weihai 264400, China

**Correspondence to:** Heinv Yang, email: statin2016@163.com

**Keywords:** metabolic syndrome; lung cancer; cohort study; meta-analysis

**Received:** July 25, 2017

**Accepted:** August 23, 2017

**Published:** March 01, 2018

**Copyright:** Li et al. This is an open-access article distributed under the terms of the Creative Commons Attribution License 3.0 (CC BY 3.0), which permits unrestricted use, distribution, and reproduction in any medium, provided the original author and source are credited.

## ABSTRACT

**Background:** Metabolic syndrome (MetS) has been related to the pathogenesis of variety categories of cancers. This meta-analysis aimed to determine the association between MetS and the incidence of lung cancer.

**Materials and Methods:** Relevant cohort studies were identified by searching of PubMed and Embase databases. Cochrane's Q test and I<sup>2</sup> statistic were used to analyze the heterogeneity. Random effect model was used for the meta-analysis.

**Results:** Five cohort studies with 188,970 participants and 1,295 lung cancer cases during follow-up were included. No significant association between MetS and lung cancer incidence was found in studies that MetS was defined by the revised NCEP-ATP III criteria (hazard ratio [HR]: 0.94, 95% confidence interval [CI]: 0.84 to 1.05,  $p = 0.25$ ; I<sup>2</sup> = 0), or IDF criteria (HR: 0.82, 95% CI: 0.61 to 1.11,  $p = 0.20$ ; I<sup>2</sup> = 0). Results were consistent in male and female participants, or in those smoking status was adjusted (HR: 0.91, 95% CI: 0.80 to 1.05,  $p = 0.21$ ; I<sup>2</sup> = 0). Sensitivity analyses omitting one study at a time did not significantly change the results. No publication bias was detected based on the Egger regression test ( $p = 0.32$ ).

**Conclusions:** Presence of MetS does not significantly influence the subsequent incidence of lung cancer.

## INTRODUCTION

Metabolic syndrome (MetS) is a cluster of metabolic disorders characterized by the pathophysiological presence of central obesity, insulin resistance, high blood pressure, and dyslipidemia [1–3]. With the aging of the global population, MetS has become a common health problem in both the developed and the developing countries, with the reported prevalence of 10–30% of the adult populations [4–6]. Accumulating evidence confirmed that patients with MetS are at higher risk for the development of many other diseases, such as cardiovascular diseases [7], venous thromboembolism [8] and osteoporosis [9]. Pathophysiologically, MetS is considered as a status of low-grade chronic inflammation [10], which may also be involved in the pathogenesis of tumor development [11]. Consistently, results of epidemiology studies suggested that presence of MetS

may confer higher risks for the development of variety categories of cancers, such the colorectal cancer [12], pancreatic cancer [13], breast cancer [14], endometrial cancer [15], hepatocellular carcinoma [16], and prostate cancer [17]. However, the association between MetS and the incidence of lung cancer, the most common malignant tumor of the world [18], has not been fully determined. In a previous meta-analysis [19], by including four cohort studies [20–23], the authors concluded that presence MetS did not affect the risk of lung cancer. However, besides studies reporting the incidence of lung cancer, they also included a study which reported the lung cancer mortality [20]. Since the outcome of cancer mortality could be affected by many clinical factors besides the anticancer treatments, including studies with mortality data may confound the overall result. Moreover, MetS has been defined by a few recently proposed sets of criteria, and these diagnostic criteria vary on whether

abdominal circumference or obesity was included as an essential criteria, whether different cut-off value of the MetS components was used, and whether patients with medications targeting each components of MetS were included [24]. Accordingly, whether MetS defined by two of the most commonly used diagnostic criteria of MetS, the International Diabetes Federation (IDF) criteria [2], and the revised National Cholesterol Education Program's Adults Treatment Panel III (NCEP-ATP III) [3], are associated differently with lung cancer risk remain to be determined. More importantly, some recently published cohort studies were not included in the previous meta-analysis [25–27]. Therefore, we performed an updated meta-analysis to evaluate the association between MetS and subsequent incidence of lung cancer.

## RESULTS

### Literature searching

The processes of database searching were presented in Figure 1. Briefly, 791 articles were found via initial literature searching of the PubMed and Embase databases, and 770 were excluded through screening of the titles and abstracts mainly because they were not relevant to the purpose of the meta-analysis. Subsequently, 21 potential relevant records underwent full-text review. Of these, 16 were further excluded because two of them were case-control studies, 11 did not report the incidence of lung cancer, two reported the outcome of lung cancer mortality, and the other one included lung cancer patients at baseline. Finally, five cohort studies were included [21–23, 25, 26].

### Study characteristics and quality evaluation

The characteristics of the included cohort studies were presented in Table 1. Briefly, our meta-analysis included 188,970 participants from five cohorts. Two studies were from Europe [21, 25], and the other three were from Asia [22, 23, 26]. Regarding the design, two studies were retrospective [23, 26], whereas the other three were prospective [21, 22, 25]. Four of the studies included general populations [21–23, 26], whereas the other one included patients with vascular disease [25]. All of the included cohorts defined MetS according to the criteria of revised NCEP-ATP III [3], and two of them also included data regarding MetS as diagnosed with the IDF criteria [2]. The incidence of lung cancer cases were mainly confirmed by the local cancer registries and 1,295 lung cancer cases occurred during follow-up. Age and gender were adjusted in all of the included studies when presenting the results, whereas smoking and alcohol intake were adjusted in four cohorts [22, 23, 25, 26] except for one study [21]. The Newcastle-Ottawa scale varied from 7 to 9 in the included cohort studies (Table 1).

### Association between the revised NCEP-ATP III defined MetS and lung cancer risk

Five cohort studies [21–23, 25, 26] with 188,970 participants reported the association between MetS diagnosed by revised NCEP-ATP III at baseline and the subsequent risk of lung cancer incidence. Result of the meta-analysis did not support a significant association between MetS at baseline and the risk of lung cancer incidence in the future (adjusted HR: 0.94, 95% CI: 0.84 to 1.05,  $p = 0.25$ ; Figure 2A) with no significant heterogeneity ( $p$  for Cochrane's  $Q$  test = 0.72,  $I^2 = 0$ ). Results of sensitivity analyses by excluding one study at a time did not significantly affect the result (adjusted HR: 0.91–0.96,  $p = 0.21$ –0.44), suggesting the stability of the main result. Moreover, excluding the study [21] in which smoking status was not adjusted showed similar result (adjusted HR: 0.91, 95% CI: 0.80 to 1.05,  $p = 0.21$ ) with no significant heterogeneity ( $p$  for Cochrane's  $Q$  test = 0.65,  $I^2 = 0$ ). Results of subgroup analyses according to the gender of the participants were also similar (for male: adjusted HR: 0.95, 95% CI: 0.80 to 1.12,  $p = 0.55$ ,  $I^2 = 27\%$ ; for female: adjusted HR: 0.84, 95% CI: 0.66 to 1.07,  $p = 0.15$ ,  $I^2 = 0$ ; Figure 2B). The difference between the results in male and female participants was not statistically significant ( $p = 0.40$ ; Figure 2B).

### Association between IDF defined MetS and lung cancer risk

Two cohorts [22, 23] with 66,556 participants reported the association between IDF defined MetS and the subsequent risk of lung cancer. Results of the meta-analysis did not show a significant association (adjusted HR: 0.82, 95% CI: 0.61 to 1.11,  $p = 0.20$ ;  $I^2 = 0$ ; Figure 3). Results of subgroup analyses according to the gender of the participants were also similar (for male: adjusted HR: 0.78, 95% CI: 0.44 to 1.39,  $p = 0.40$ ,  $I^2 = 50\%$ ; for female: adjusted HR: 0.81, 95% CI: 0.50 to 1.31,  $p = 0.39$ ,  $I^2 = 0$ ; Figure 3). The difference between subgroups was not statistically significant ( $p = 0.93$ ).

### Publication bias

The funnel plot regarding MetS diagnosed by revised NCEP-ATP III at baseline and risk of cognitive decline was shown in Figure 4. The funnel plot was symmetry on visual inspection. Results of Egger regression test suggested that no significant publication bias was detected ( $p = 0.32$ ). The publication bias for the meta-analysis of association between IDF defined MetS and the subsequent risk of lung cancer was difficult to estimate since limited cohorts were included.

## DISCUSSION

In this meta-analysis, by pooling the results of five cohort studies of 188,970 participants, the result showed

**Table 1: Characteristics of the included cohort studies**

| Study                  | Country         | Design | Characteristics of the participants        | Number of participants | Diagnostic criteria of MetS | Follow-up period | Diagnosis of lung cancer            | Number of lung cancer cases | Outcome reported | Variables adjusted                                                                           | NOS |
|------------------------|-----------------|--------|--------------------------------------------|------------------------|-----------------------------|------------------|-------------------------------------|-----------------------------|------------------|----------------------------------------------------------------------------------------------|-----|
|                        |                 |        |                                            |                        |                             | years            |                                     |                             |                  |                                                                                              |     |
| <b>Russo 2008</b>      | Italy           | PC     | Community based population                 | 16677                  | NCEP-ATP III                | 1999–2005        | Local Cancer Registry               | 118                         | M, F, T          | Age, gender                                                                                  | 7   |
| <b>Inoue 2009</b>      | Japan           | PC     | Community based population                 | 27724                  | NCEP-ATP III and IDF        | 1990–2014        | National cancer registries          | 224                         | M, F             | Age, study area, smoking status, alcohol intake, daily total physical activity level, and TC | 9   |
| <b>Osaki 2012</b>      | Japan           | RC     | General health examinees                   | 38832                  | NCEP-ATP III and IDF        | 1992–2007        | Tottori prefectural cancer registry | 211                         | M, F             | Age, smoking status, alcohol intake                                                          | 9   |
| <b>Kruijsdijk 2013</b> | the Netherlands | PC     | Patients with vascular diseases            | 6172                   | NCEP-ATP III                | 1996–2011        | Netherlands Cancer Registry         | 118                         | T                | Age, gender, smoking status, alcohol intake                                                  | 8   |
| <b>Ko 2016</b>         | Korea           | RC     | National sample cohort for health check-up | 99565                  | NCEP-ATP III                | 2002–2013        | Local Cancer Registry               | 624                         | M, F             | Age, gender, smoking status, alcohol intake, and exercise                                    | 9   |

Abbreviations: NOS, the Newcastle-Ottawa Scale; PC, prospective cohort; RC, retrospective cohort; MetS, metabolic syndrome; NCEP-ATP III, National Cholesterol Education Program's Adults Treatment Panel III; IDF: International Diabetes Federation; M, male; F, female; T, total; TC, total cholesterol.

that presence of MetS does not significantly influence the subsequent incidence of lung cancer. The results were consistent in male and female participants, and in studies in which the smoking habit was adjusted when presenting the result. Moreover, the association between MetS and lung cancer incidence was not affected by the definitions of MetS (based on the revised NCEP-ATP III

or IDF criteria). These results suggested that based on current evidence, MetS may not be a risk factor for the development of lung cancer.

Results of our study may have important clinical implications because these findings are contrast to the conventional viewpoint that patients with Mets are at higher risk for developing lung cancer because the

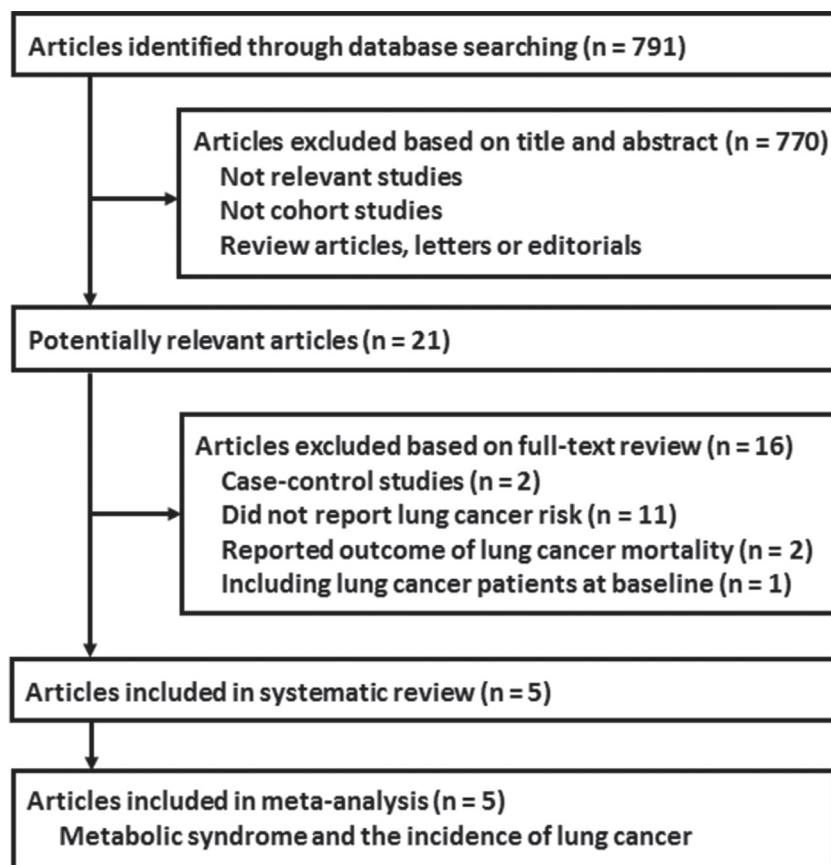**Figure 1: Flowchart for database searching and literature screening.**

components of MetS are potential risk factors for lung cancer, and these patients are with poor living habits, such as smoking, unhealthy diet, and alcohol drinking. Accordingly, results of our meta-analysis may reflect the fact that the components of MetS may have different influence on the risk of lung cancer. For the association between obesity and lung cancer risk, current evidence is not consistent. A previous meta-analysis 31 studies showed that obesity is protective factor against lung cancer [28], whereas another study in Chinese patients suggested that the protective effect of obesity against lung cancer may be confounded by the smoking status [29]. Subsequent meta-analysis of six prospective cohort studies indicated that abdominal obesity may be a risk factor for the incidence of lung cancer [30]. Moreover, as for the lipids profiles, recent evidence indicated that higher high-density lipoprotein cholesterol level is protective against the lung cancer, whereas higher triglyceride is associated

with higher lung cancer incidence [31]. In addition, results regarding the association between hypertension and lung cancer risk are inconsistent. The result Metabolic Syndrome and Cancer Project indicated a small increased lung cancer risk in men with elevated blood pressure level, but not in women [32]. However, an early study in Korean men showed that hypertension was not an independent risk factor in lung cancer mortality [33]. Similarly, result of a meta-analysis of 14 cohort studies also indicated that no association between diabetes and lung cancer risk exists [34]. Taken together, only higher triglyceride of MetS components may relate to the higher risk of lung cancer, and the association between MetS and subsequent risk of lung cancer may depend on the predominance of the distribution of the components. Also, since patients with MetS often have unhealthy life styles, such as smoking, alcohol drinking and less exercise, these factors may confound the association between MetS and lung cancer.

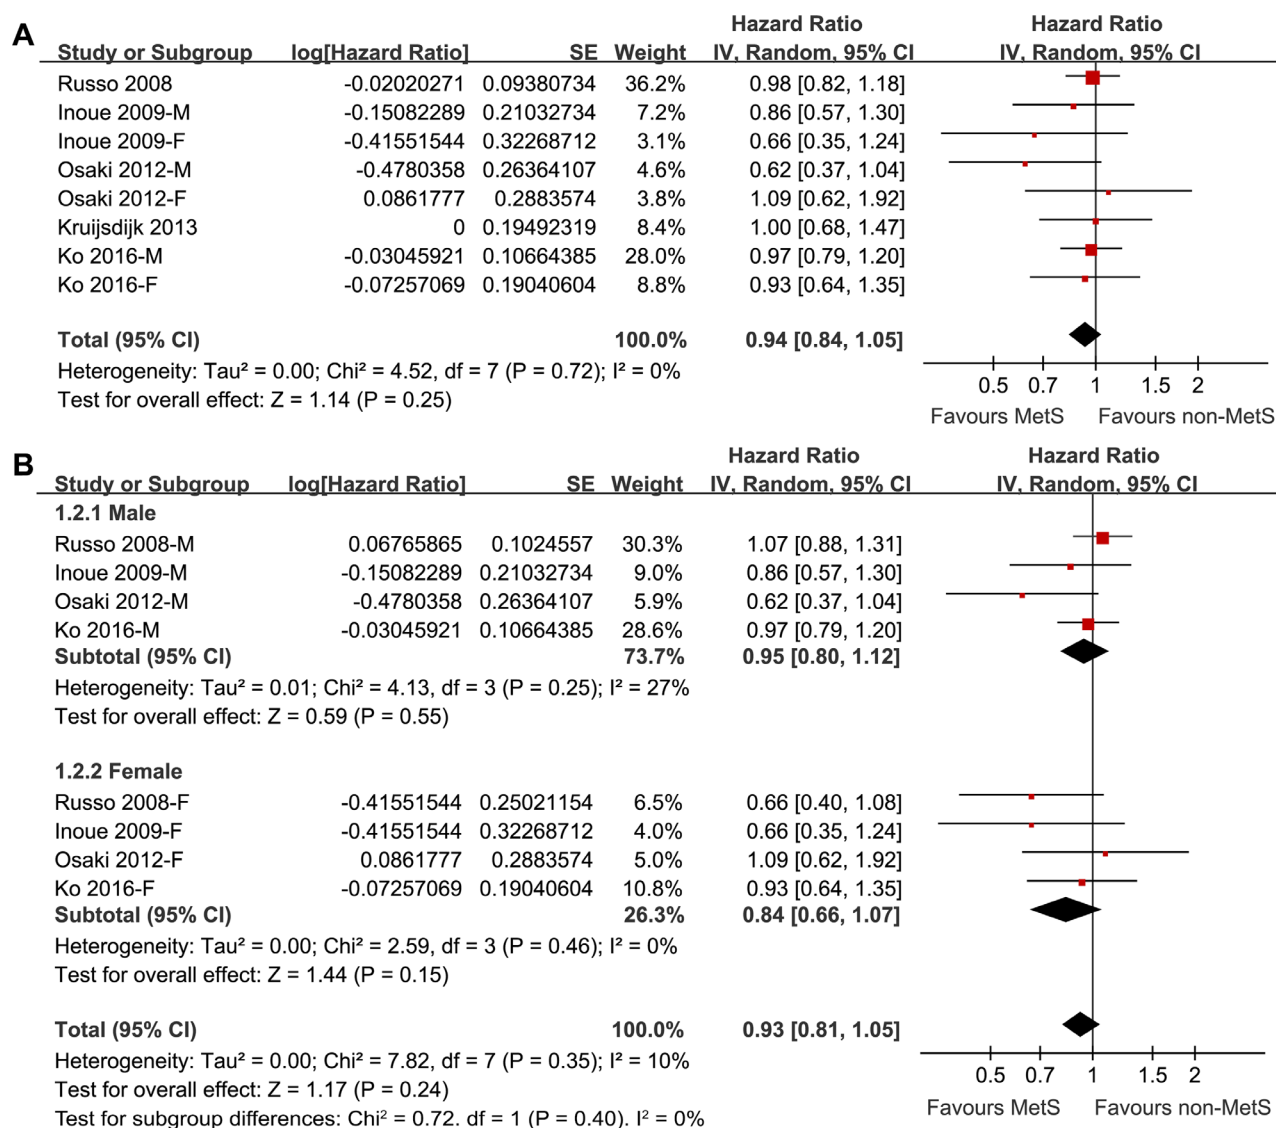

**Figure 2: Forest plot for the meta-analysis of the association between the revised NCEP-ATP III defined MetS and lung cancer risk. (A) forest plot for the overall participants; (B) forest plot for the subgroup analysis by gender.**

Most of our included studies adjusted these factors, which may therefore weaken the association between MetS and Lung cancer incidence. Moreover, accumulating evidence showed that treatments against the components of Mets, such as metformin [35], may lead to a reduced risk of lung cancer incidence. Whether these factors may confound the association between MetS and Lung cancer risk also deserves further investigation.

Our study has limitations which should be considered when interpreting the results. Firstly, as a

meta-analysis of observational studies, results of our study did not support a sequential association between MetS and lung cancer incidence. Whether Mets plays a causative role in the pathogenesis of lung cancer remains to be determined. Clinical trials evaluating the influence of the treatments against the components of MetS on the incidence lung cancer may be optimal. Secondly, although MetS defined by revised NCEP-ATP III or IDF criteria was not associated with lung cancer incidence, association between MetS defined by other criteria and

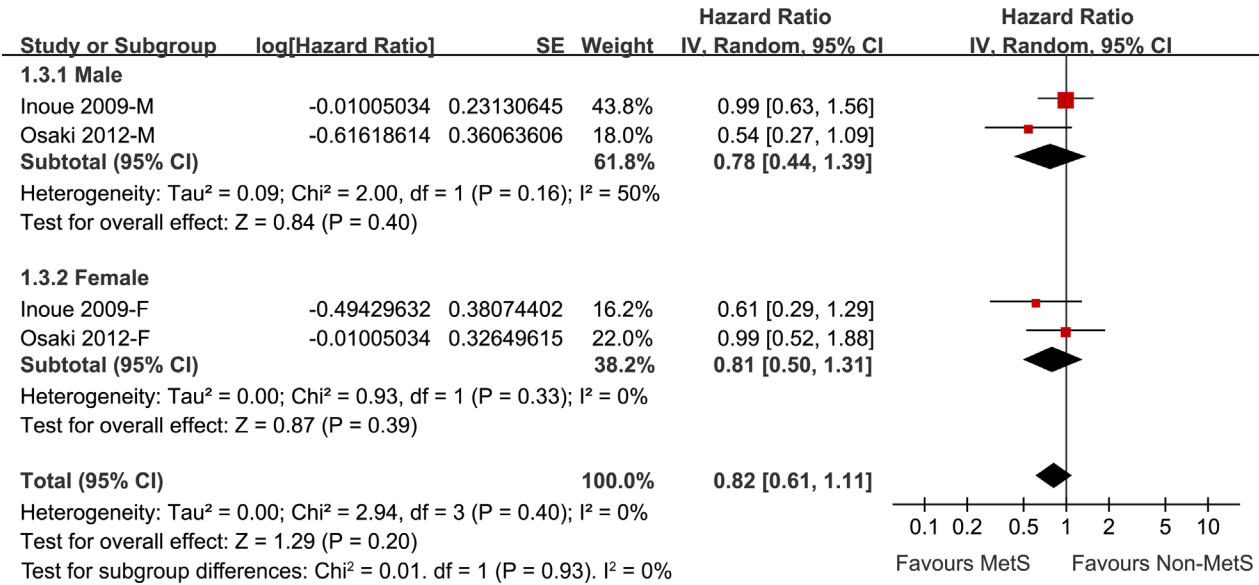

**Figure 3: Forest plot for the meta-analysis of the association between IDF defined MetS and lung cancer risk stratified by gender.**

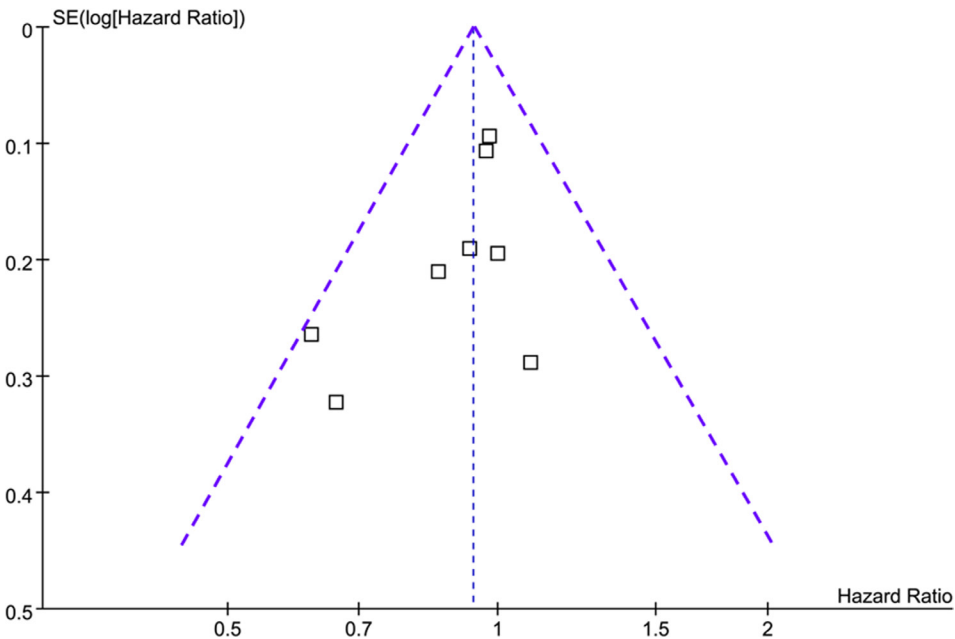

**Figure 4: Funnel plot for the meta-analysis of the association between the revised NCEP-ATP III defined MetS and lung cancer risk.**



subsequent lung cancer incidence remains undetermined. Thirdly, although our study combined the data of 188,970 participants and 1,295 cases of lung cancer, we could not fully exclude the possibility that the scale of the study is not adequate to be statistically powered for the detection of the association between MetS and lung cancer incidence. Finally, since no pathological data were available, we were unable to determine whether no association between MetS and lung cancer exist regardless of the pathologic categories of the cancer.

In conclusion, results of our meta-analysis showed that presence of MetS does not significantly influence the subsequent incidence of lung cancer. The previous supposition that MetS patients may have higher risk of lung cancer may be confounded by the factors of poor lifestyle, including smoking.

## MATERIALS AND METHODS

We performed the meta-analysis in accordance with the MOOSE (Meta-analysis of Observational Studies in Epidemiology) [36] and Cochrane's Handbook [37] guidelines.

### Literature searching

Databases of PubMed and Embase were searched for relevant records, using the terms “metabolic syndrome”, “insulin resistance syndrome”, or “syndrome X”, combined with “cancer”, “neoplasm”, “carcinoma”, and “prospective”, “prospectively”, “retrospective”, “retrospectively”, “followed”, “follow-up”, “cohort”, or “cohorts”. The searching was limited to studies in humans and published in English language. The reference lists of original and review articles were also analyzed using a manual approach. The final literature search was performed on June 20, 2017.

### Study selection

Articles were included in the meta-analysis if they met all the following criteria: (1) published as full-length article in English; (2) reported as cohort studies (prospective or retrospective, regardless of sample size) with the follow-up duration of at least one year; (3) included adult population ( $\geq 18$  years of age) without lung cancer at baseline; (4) MetS defined according to the criteria of the original articles was identified as exposure of interest at baseline; (5) participants without MetS at baseline was used as controls; (6) documented the incidences of lung cancer during follow-up; and (7) reported the adjusted hazard ratios (HRs, at least adjusted for age) and their corresponding 95% confidence intervals (CIs) for the incidence of lung cancer comparing individuals with MetS at baseline to those without MetS.

Reviews, letters, editorials, and studies with designs other than cohort study were excluded.

### Data extracting and quality evaluation

Two authors independently performed literature searching, data extraction, and quality assessment according to the predefined inclusion criteria. Discrepancies were resolved by consensus. Data that were extracted include: (1) name of first author, year of publication and country where the study was performed; (2) design characteristics (prospective or retrospective); (3) characteristics and numbers of the participants; (4) criteria for the diagnosis of MetS; (5) follow-up period; (6) Number of lung cancer case in each study; and (7) variables adjusted when presenting the results. The quality of each study was evaluated using the Newcastle-Ottawa Scale [38] which ranges from 1 to 9 stars and judges each study regarding three aspects: selection of the study groups; the comparability of the groups; and the ascertainment of the outcome of interest.

### Statistical analyses

We used HRs as the general measure for the association between MetS at baseline and the incidence of lung cancer. Data of HRs and their corresponding stand errors (SEs) were calculated from 95% CIs or  $p$  values, and were logarithmically transformed to stabilize variance and normalized the distribution [37]. The Cochrane's  $Q$  test and  $I^2$  test were used to evaluate the heterogeneity among the include cohort studies [39]. A significant heterogeneity was considered if  $I^2 > 50\%$ . We used a random effect model to synthesize the HR data because this model is considered as a more generalized method which incorporates of the potential heterogeneity [37]. Sensitivity analyses, by removing individual study one at a time, were performed to test the robustness of the results [40]. Predefined subgroup analyses were performed to evaluate whether the association between MetS and lung cancer incidence was affected by gender of the participants, or adjustment of the smoking habit, in view of the fact that smoking has been proved to be a major risk factor of lung cancer [41]. Moreover, potential publication bias was assessed by funnel plots with the Egger regression asymmetry test [42]. We used the RevMan (Version 5.1; Cochrane Collaboration, Oxford, UK) and STATA software for the meta-analysis and statistics.

### Author contributions

Dong Li and Heiniv Yang designed the study, performed the literature retrieval and information extraction, statistical analysis, drafted the manuscript, and approved the final version of the manuscript.

## ACKNOWLEDGMENTS

None.

## CONFLICTS OF INTEREST

None.

## FUNDING

None.

## REFERENCES

1. Eckel RH, Grundy SM, Zimmet PZ. The metabolic syndrome. *Lancet*. 2005; 365:1415–1428.
2. Alberti KG, Zimmet P, Shaw J. Metabolic syndrome—a new world-wide definition. A Consensus Statement from the International Diabetes Federation. *Diabet Med*. 2006; 23:469–480.
3. Grundy SM, Cleeman JI, Merz CN, Brewer HB Jr, Clark LT, Hunninghake DB, Pasternak RC, Smith SC Jr, Stone NJ. Implications of recent clinical trials for the National Cholesterol Education Program Adult Treatment Panel III guidelines. *Circulation*. 2004; 110:227–239.
4. He YN, Zhao WH, Zhao LY, Yu DM, Zhang J, Yang XG, Ding GG. [Prevalence of metabolic syndrome in Chinese adults in 2010–2012]. [Article in Chinese; Abstract available in Chinese from the publisher]. *Zhonghua Liu Xing Bing Xue Za Zhi*. 2017; 38:212–215.
5. Li R, Li W, Lun Z, Zhang H, Sun Z, Kanu JS, Qiu S, Cheng Y, Liu Y. Prevalence of metabolic syndrome in Mainland China: a meta-analysis of published studies. *BMC Public Health*. 2016; 16:296.
6. Grundy SM. Metabolic syndrome pandemic. *Arterioscler Thromb Vasc Biol*. 2008; 28:629–636.
7. Mottillo S, Filion KB, Genest J, Joseph L, Pilote L, Poirier P, Rinfret S, Schiffrin EL, Eisenberg MJ. The metabolic syndrome and cardiovascular risk a systematic review and meta-analysis. *J Am Coll Cardiol*. 2010; 56:1113–1132.
8. Ageo W, Di Minno MN, Ay C, Jang MJ, Hansen JB, Steffen LM, Vaya A, Rattazzi M, Pabinger I, Oh D, Di Minno G, Braekkan SK, Cushman M, et al. Association between the metabolic syndrome, its individual components, and unprovoked venous thromboembolism: results of a patient-level meta-analysis. *Arterioscler Thromb Vasc Biol*. 2014; 34:2478–2485.
9. Zhou J, Zhang Q, Yuan X, Wang J, Li C, Sheng H, Qu S, Li H. Association between metabolic syndrome and osteoporosis: a meta-analysis. *Bone*. 2013; 57:30–35.
10. Mendonca FM, de Sousa FR, Barbosa AL, Martins SC, Araujo RL, Soares R, Abreu C. Metabolic syndrome and risk of cancer: which link? *Metabolism*. 2015; 64:182–189.
11. Fernandes JV, Cobucci RN, Jatoba CA, Fernandes TA, de Azevedo JW, de Araujo JM. The role of the mediators of inflammation in cancer development. *Pathol Oncol Res*. 2015; 21:527–534.
12. Esposito K, Chiodini P, Capuano A, Bellastella G, Maiorino MI, Rafaniello C, Panagiotakos DB, Giugliano D. Colorectal cancer association with metabolic syndrome and its components: a systematic review with meta-analysis. *Endocrine*. 2013; 44:634–647.
13. Rosato V, Tavani A, Bosetti C, Pelucchi C, Talamini R, Polesel J, Serraino D, Negri E, La Vecchia C. Metabolic syndrome and pancreatic cancer risk: a case-control study in Italy and meta-analysis. *Metabolism*. 2011; 60:1372–1378.
14. Bhandari R, Kelley GA, Hartley TA, Rockett IR. Metabolic syndrome is associated with increased breast cancer risk: a systematic review with meta-analysis. *Int J Breast Cancer*. 2014; 2014:189384.
15. Esposito K, Chiodini P, Capuano A, Bellastella G, Maiorino MI, Giugliano D. Metabolic syndrome and endometrial cancer: a meta-analysis. *Endocrine*. 2014; 45:28–36.
16. Jinjavadia R, Patel S, Liangpunsakul S. The association between metabolic syndrome and hepatocellular carcinoma: systemic review and meta-analysis. *J Clin Gastroenterol*. 2014; 48:172–177.
17. Gacci M, Russo GI, De Nunzio C, Sebastianelli A, Salvi M, Vignozzi L, Tubaro A, Morgia G, Serni S. Meta-analysis of metabolic syndrome and prostate cancer. *Prostate Cancer Prostatic Dis*. 2017; 20:146–155.
18. Torre LA, Bray F, Siegel RL, Ferlay J, Lortet-Tieulent J, Jemal A. Global cancer statistics, 2012. *CA Cancer J Clin*. 2015; 65:87–108.
19. Esposito K, Chiodini P, Colao A, Lenzi A, Giugliano D. Metabolic syndrome and risk of cancer: a systematic review and meta-analysis. *Diabetes Care*. 2012; 35:2402–2411.
20. Jaggars JR, Sui X, Hooker SP, LaMonte MJ, Matthews CE, Hand GA, Blair SN. Metabolic syndrome and risk of cancer mortality in men. *Eur J Cancer*. 2009; 45:1831–1838.
21. Russo A, Autelitano M, Bisanti L. Metabolic syndrome and cancer risk. *Eur J Cancer*. 2008; 44:293–297.
22. Inoue M, Noda M, Kurahashi N, Iwasaki M, Sasazuki S, Iso H, Tsugane S. Impact of metabolic factors on subsequent cancer risk: results from a large-scale population-based cohort study in Japan. *Eur J Cancer Prev*. 2009; 18:240–247.
23. Osaki Y, Taniguchi S, Tahara A, Okamoto M, Kishimoto T. Metabolic syndrome and incidence of liver and breast cancers in Japan. *Cancer Epidemiol*. 2012; 36:141–147.
24. Yamagishi K, Iso H. The criteria for metabolic syndrome and the national health screening and education system in Japan. *Epidemiol Health*. 2017; 39:e2017003.
25. van Kruijsdijk RC, van der Graaf Y, Peeters PH, Visseren FL. Cancer risk in patients with manifest vascular disease: effects of smoking, obesity, and metabolic syndrome. *Cancer Epidemiol Biomarkers Prev*. 2013; 22:1267–1277.

26. Ko S, Yoon SJ, Kim D, Kim AR, Kim EJ, Seo HY. Metabolic Risk Profile and Cancer in Korean Men and Women. *J Prev Med Public Health*. 2016; 49:143–152.
27. Gathirua-Mwangi WG, Monahan PO, Murage MJ, Zhang J. Metabolic syndrome and total cancer mortality in the Third National Health and Nutrition Examination Survey. *Cancer Causes Control*. 2017; 28:127–136.
28. Yang Y, Dong J, Sun K, Zhao L, Zhao F, Wang L, Jiao Y. Obesity and incidence of lung cancer: a meta-analysis. *Int J Cancer*. 2013; 132:1162–1169.
29. Guo L, Liu S, Zhang S, Chen Q, Zhang M, Quan P, Lu J, Sun X. [A meta-analysis of body mass index and the risk of lung cancer in the Chinese population]. [Article in Chinese]. *Zhonghua Yu Fang Yi Xue Za Zhi*. 2015; 49:649–53.
30. Hidayat K, Du X, Chen G, Shi M, Shi B. Abdominal Obesity and Lung Cancer Risk: Systematic Review and Meta-Analysis of Prospective Studies. *Nutrients*. 2016; 8.
31. Lin X, Lu L, Liu L, Wei S, He Y, Chang J, Lian X. Blood lipids profile and lung cancer risk in a meta-analysis of prospective cohort studies. *J Clin Lipidol*. 2017; 11:1073–1081.
32. Stocks T, Van Hemelrijck M, Manjer J, Bjorge T, Ulmer H, Hallmans G, Lindkvist B, Selmer R, Nagel G, Tretli S, Concini H, Engeland A, Jonsson H, et al. Blood pressure and risk of cancer incidence and mortality in the Metabolic Syndrome and Cancer Project. *Hypertension*. 2012; 59:802–810.
33. Lee SY, Kim MT, Jee SH, Im JS. Does hypertension increase mortality risk from lung cancer? A prospective cohort study on smoking, hypertension and lung cancer risk among Korean men. *J Hypertens*. 2002; 20:617–622.
34. Wang Z, Bao C, Su C, Xu W, Luo H, Chen L, Qi X. Association between diabetes or antidiabetic therapy and lung cancer: A meta-analysis. *J Diabetes Investig*. 2013; 4:659–666.
35. Zhu N, Zhang Y, Gong YI, He J, Chen X. Metformin and lung cancer risk of patients with type 2 diabetes mellitus: A meta-analysis. *Biomed Rep*. 2015; 3:235–241.
36. Stroup DF, Berlin JA, Morton SC, Olkin I, Williamson GD, Rennie D, Moher D, Becker BJ, Sipe TA, Thacker SB. Meta-analysis of observational studies in epidemiology: a proposal for reporting. Meta-analysis Of Observational Studies in Epidemiology (MOOSE) group. *JAMA*. 2000; 283:2008–2012.
37. Higgins J, Green S. *Cochrane Handbook for Systematic Reviews of Interventions Version 5.1.0*. The Cochrane Collaboration. 2011; [www.cochranehandbook.org](http://www.cochranehandbook.org).
38. Wells GA, Shea B, O'Connell D, Peterson J, Welch V, Losos M, Tugwell P. The Newcastle-Ottawa Scale (NOS) for assessing the quality of nonrandomised studies in meta-analyses. 2010; [http://www.ohri.ca/programs/clinical\\_epidemiology/oxford.asp](http://www.ohri.ca/programs/clinical_epidemiology/oxford.asp).
39. Higgins JP, Thompson SG. Quantifying heterogeneity in a meta-analysis. *Stat Med*. 2002; 21:1539–1558.
40. Patsopoulos NA, Evangelou E, Ioannidis JP. Sensitivity of between-study heterogeneity in meta-analysis: proposed metrics and empirical evaluation. *Int J Epidemiol*. 2008; 37:1148–1157.
41. Amos CI, Hung R, Bosse Y, Christiani DC, Field JK, Landi MT, Brennan PB, McKay JP. P1.04: Defining the Genetic Architecture of Lung Cancer Etiology: Track: Prevention, Early Detection, Epidemiology and Tobacco Control. *J Thorac Oncol*. 2016; 11:S182.
42. Egger M, Davey Smith G, Schneider M, Minder C. Bias in meta-analysis detected by a simple, graphical test. *BMJ*. 1997; 315:629–634.
